# Supplementary material for: Highly branched organic microcrystals via self-organization and growth kinetics manipulation
Source: Royal Society of Chemistry journal article supplement (doi:10.1039/c2ce26348c), 2012-01-01
Supplement: c2ce26348c.pdf [file c2ce26348c.pdf]

## Supporting Information

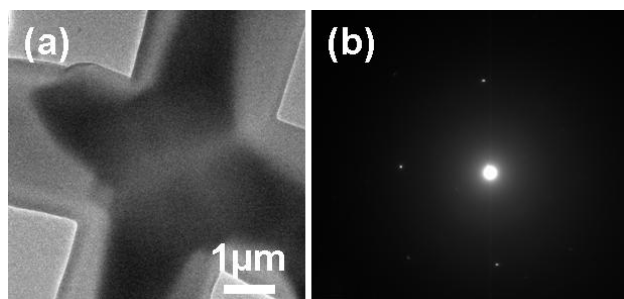

**Fig. S1** (a) TEM image of the as-prepared octapod microcrystal. (b) occasionally obtained electron diffraction pattern.

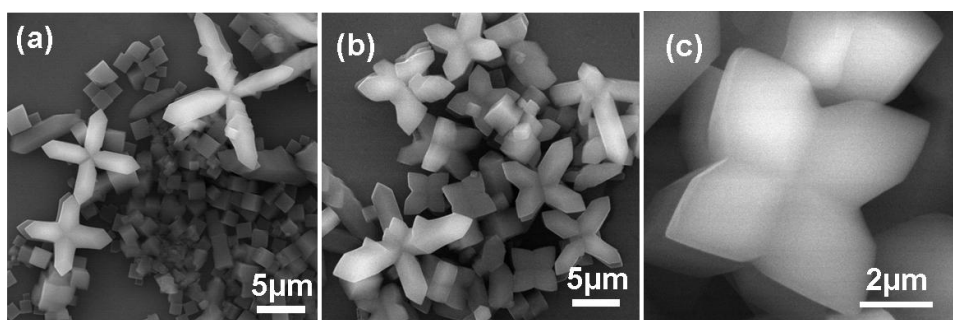

**Fig. S2** SEM images of products obtained during the growth process of octapod-shaped microcrystals.
